# Supplementary material
Source: ML conference proceedings conference paper supplement (https://aclanthology.org/2023.inlg-main.34)
Supplement: Supplementary_Attachment [file 2023.inlg-main.34.Supplementary_Attachment.pdf]

## A Detailed Statistics

### Frequency in language usage

|          | Daily | Weekly | Monthly |
|----------|-------|--------|---------|
| Hearing  | 17    | 2      | 0       |
| Speaking | 16    | 3      | 0       |
| Reading  | 15    | 4      | 0       |
| Writing  | 11    | 5      | 3       |

Table 3: Frequency with which participants encountered or used Scottish Gaelic in different modalities. Additional response options included ‘Quarterly’ or ‘Seasonal’, ‘Yearly’, and ‘Never’, but no participants chose these options.

**Questions and qualifiers** put to participants regarding the frequency with which they interacted with Scottish Gaelic (answer counts in Table 3):

- How often do you hear Scottish Gaelic? Everything counts! Radio and TV, conversations with friends, family, colleagues, overheard at shops, everything!
- How often do you speak Scottish Gaelic? Everything counts! With friends or family, at work, formally, informally, everything!
- How often do you read Scottish Gaelic? Almost everything counts! Newspapers, poems, books, text messages! Everything but road signs and placenames.
- How often do you write Scottish Gaelic? Everything counts! Notes to yourself, text messages or chats, poetry, essays, blogposts, everything!

### Geographic distribution of participants

| Location            | Count |
|---------------------|-------|
| Highlands & Islands | 13    |
| Lowlands            | 0     |
| Central Belt        | 4     |
| South & Borders     | 1     |
| Outside Scotland    | ?     |

Table 4: Geographic distribution of participants. Participants were asked, “Where in Scotland do you live?” with the clarification of the categories that “We define a few broad regions so the results are not too specific.”

Definitions for geographic regions in Table 4:

- **Highlands & Islands** Na h-Eileanan Siar, Highland, Orkney, Shetland
- **Lowlands** Moray, Aberdeenshire, Aberdeen City, Angus, Dundee City, Fife, Stirling, Argyll & Bute, Perth & Kinross, Clackmannanshire
- **Central Belt** Glasgow City, West & East Dunbartonshire, North Lanarkshire, Falkirk, West Lothian, City of Edinburgh
- **South & Borders** Inverclyde, Renfrewshire, North & South & East Ayrshire, East Renfrewshire, South Lanarkshire, Midlothian, East Lothian, Scottish Borders, Dumfries & Galloway

## Demographics

|                  | 0-12 | 12-18 | 18-24 | 25-34 | 35-44 | 45-54 | 55+ |
|------------------|------|-------|-------|-------|-------|-------|-----|
| Current Age      | NA   | NA    | 1     | 5     | 4     | 4     | 5   |
| Started Learning | 6    | 3     | 8     | 1     | 0     | 0     | 1   |

Table 5: Participant current ages and their ages when they started learning Scottish Gaelic. Participants were asked, “How old are you?” and “At what age did you start learning Scottish Gaelic?”, respectively. Only adults were allowed to participate in the experiment.

## Education

| Combination of Formal Study Experiences                                                                          | Count |
|------------------------------------------------------------------------------------------------------------------|-------|
| Yes, classes at secondary school                                                                                 | 2     |
| Yes, in primary school; Yes, classes at secondary school                                                         | 3     |
| Yes, classes at the graduate or post-graduate level                                                              | 8     |
| Yes, community or continuing education classes                                                                   | 1     |
| Yes, classes at the graduate or post-graduate level; Yes, community or continuing education classes              | 2     |
| Yes, classes at the graduate or post-graduate level; Yes, community or continuing education classes; Yes (other) | 1     |
| No                                                                                                               | 2     |

Table 6: Combination of participant responses to the question, “Have you ever taken classes in Scottish Gaelic?”.

## Sources

| Exhibit                    | Num. Images | QUESTIONER |        | RESPONDER    |         |
|----------------------------|-------------|------------|--------|--------------|---------|
|                            |             | # Keywords | Length | # Paragraphs | Length  |
| The Arthur's Seat Coffins  | 1           | 5          | 135    | 5            | 423     |
| Ballachulish Figure        | 2           | 7          | 182    | 4            | 405     |
| The Bute Mazer             | 3           | 9          | 262    | 5            | 379     |
| (Flora MacDonald) Snuffbox | 1           | 5          | 96     | 8            | 372     |
| Gaelic Bible               | 1           | 5          | 137    | 6            | 358     |
| Galloway Hoard             | 3           | 9          | 262    | 6            | 425     |
| Lewis Chesspieces          | 1           | 8          | 199    | 5            | 382     |
| Monymusk Reliquary         | 2           | 8          | 218    | 6            | 223     |
| Queen Mary Harp            | 1           | 10         | 244    | 5            | 411     |
| Rob Roy Sporrans Clasp     | 1           | 7          | 144    | 7            | 420     |
| The Maiden                 | 1           | 3          | 40     | 6            | 414     |
| Towie Ball                 | 1           | 4          | 97     | 6            | 391     |
| Witch's Collar             | 1           | 7          | 191    | 7            | 402     |
| MEAN                       | 1.5         | 6.7        | 169.8  | 5.9          | 385.0   |
| STANDARD DEVIATION         | 0.8         | 2.1        | 68.8   | 1.1          | 53.0    |
| MINIMUM–MAXIMUM            | 1–3         | 3–10       | 40–262 | 4–8          | 223–425 |

Table 7: Detailed information about the backing data for participants' conversations. All texts are in Scottish Gaelic, with a link to an English version available to participants as well.
